# Supplementary material for: Identification of a c-MYB-directed therapeutic for acute myeloid leukemia
Source: PubMed Central journal article supplement (PMC9162920; doi:10.1038/s41375-022-01554-9), 2022-04-02

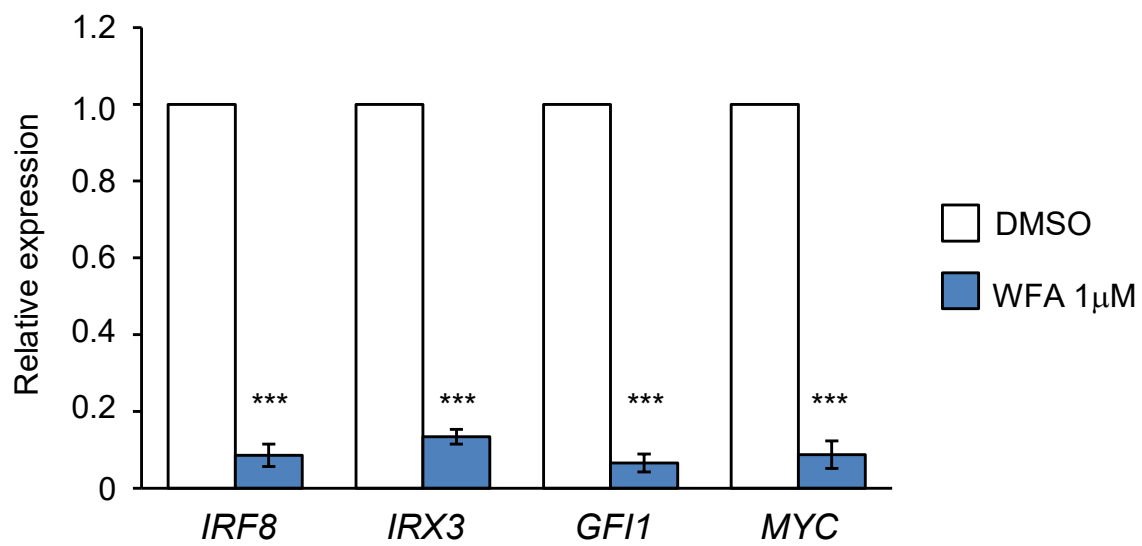

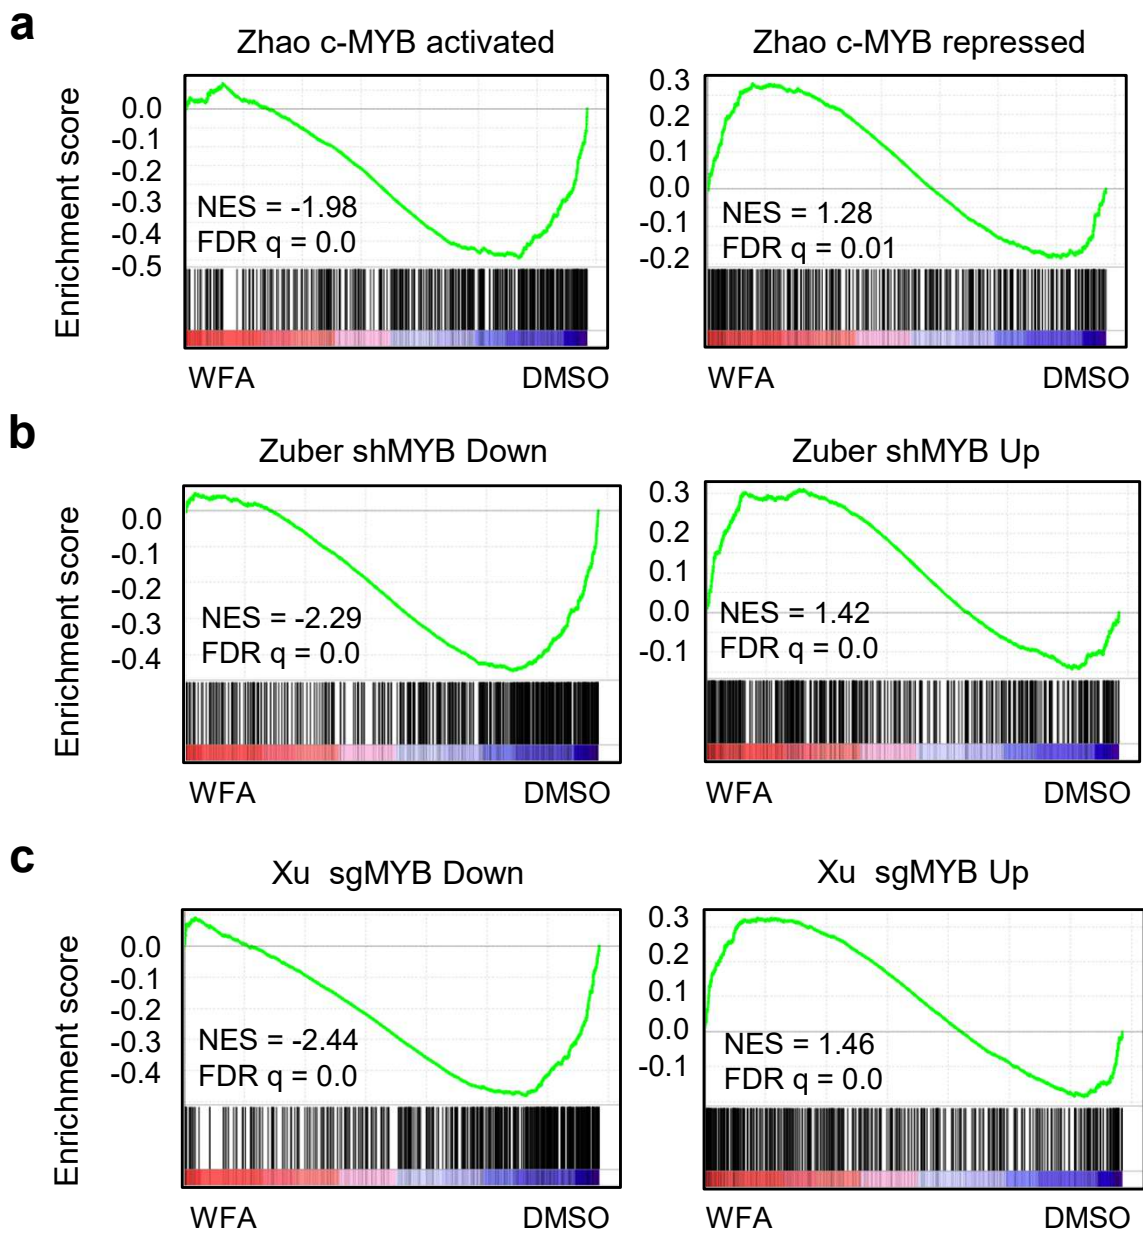

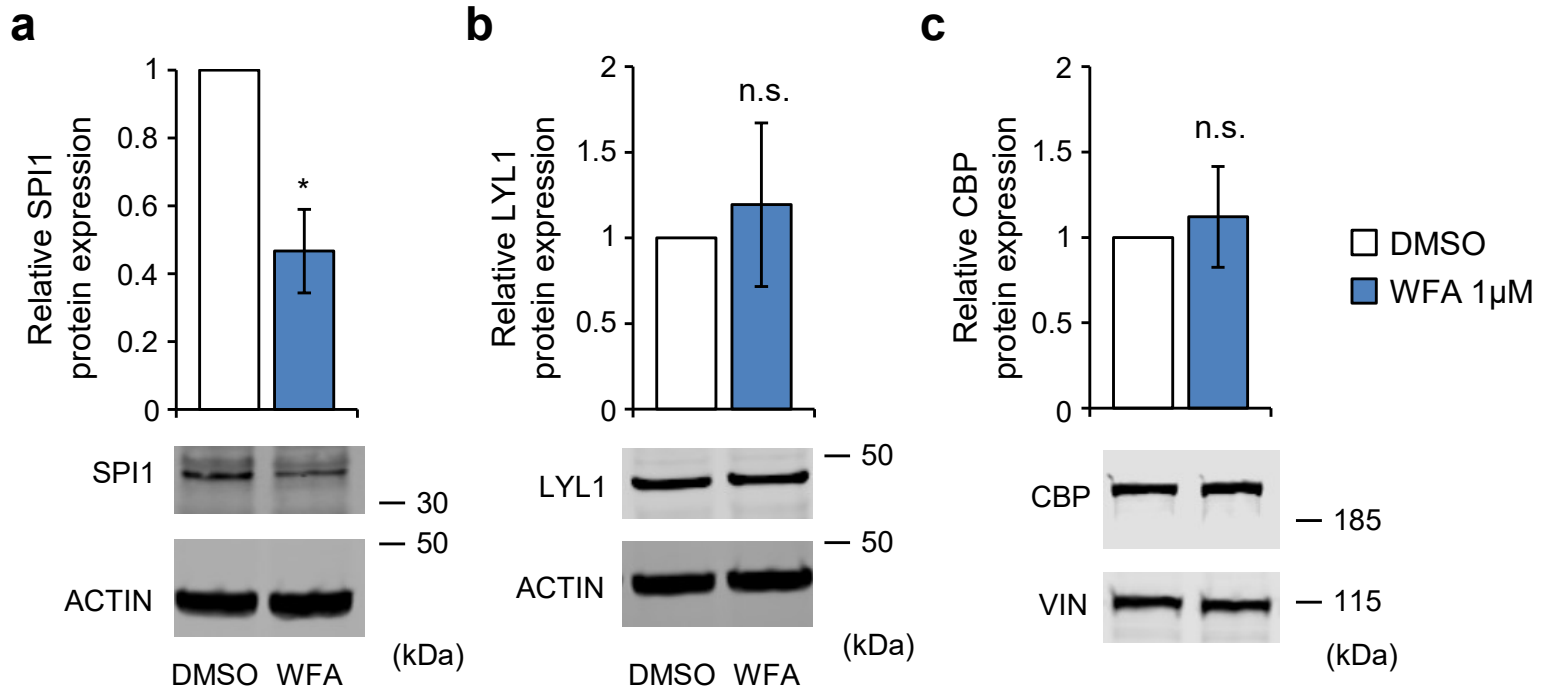

Supplementary Figure 3

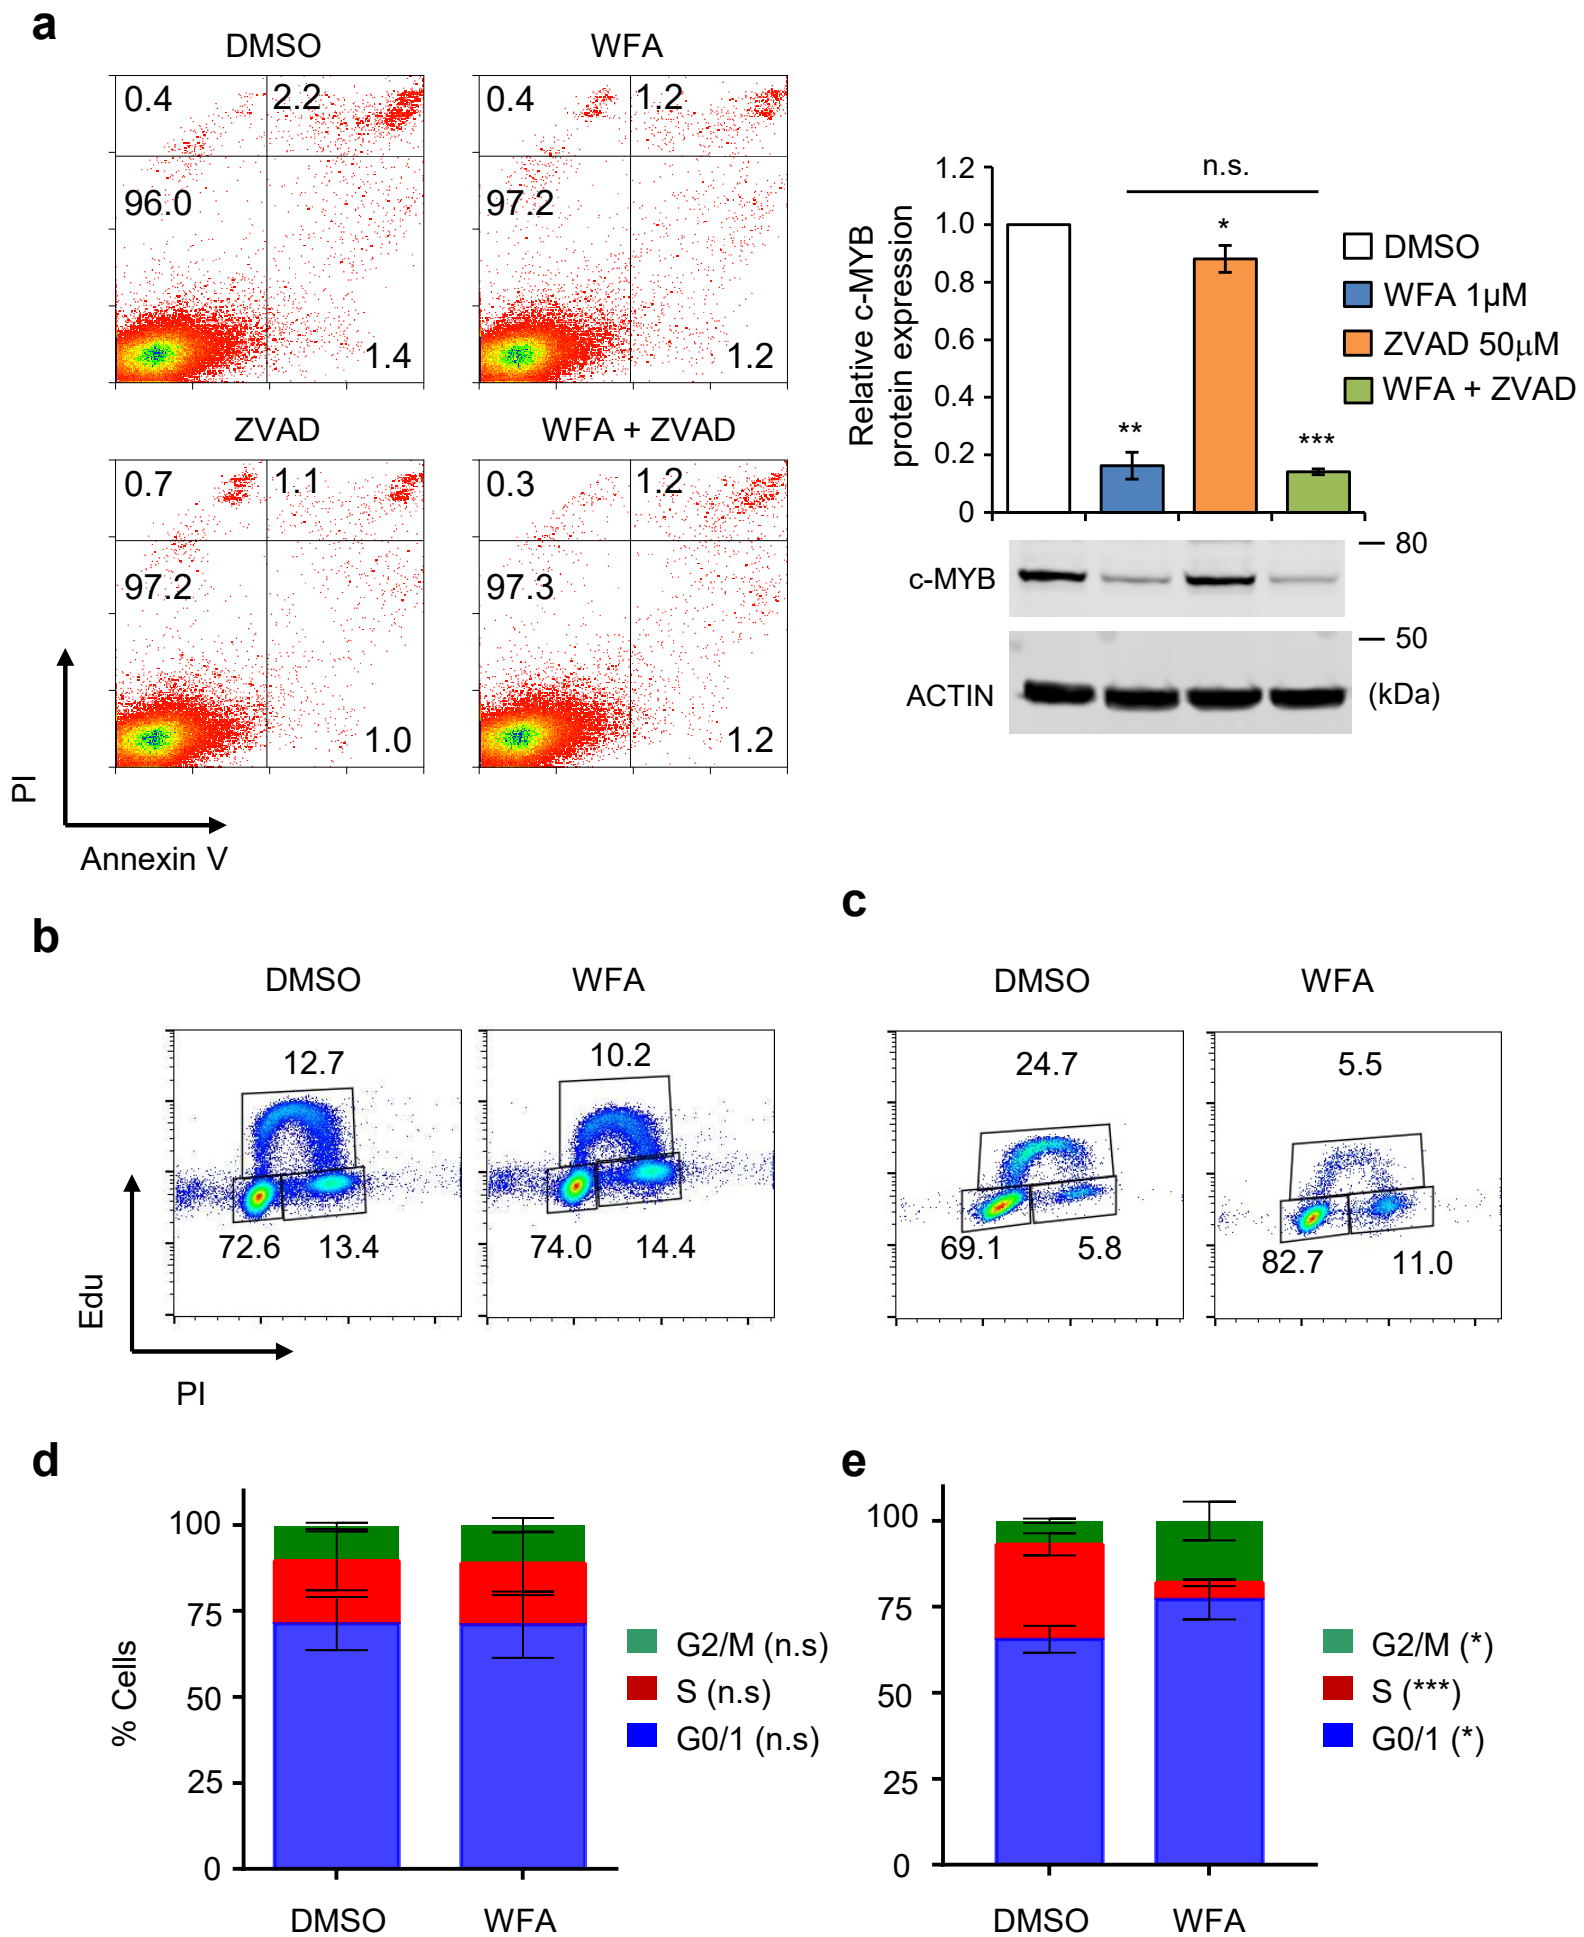

Supplementary Figure 4

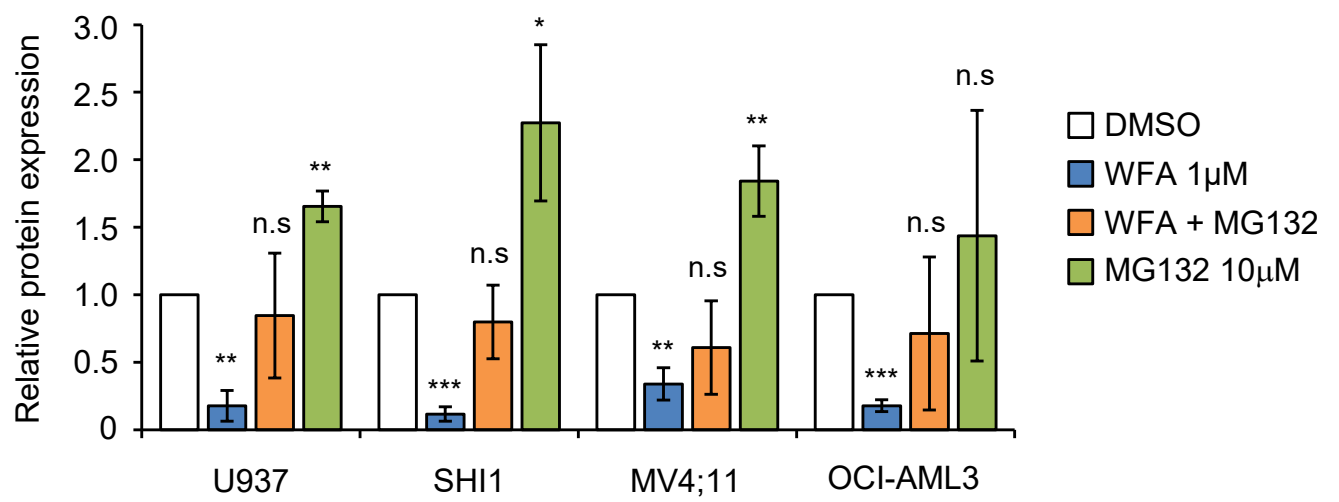

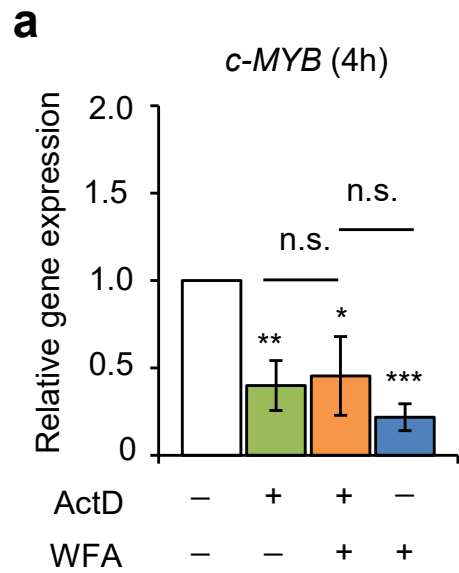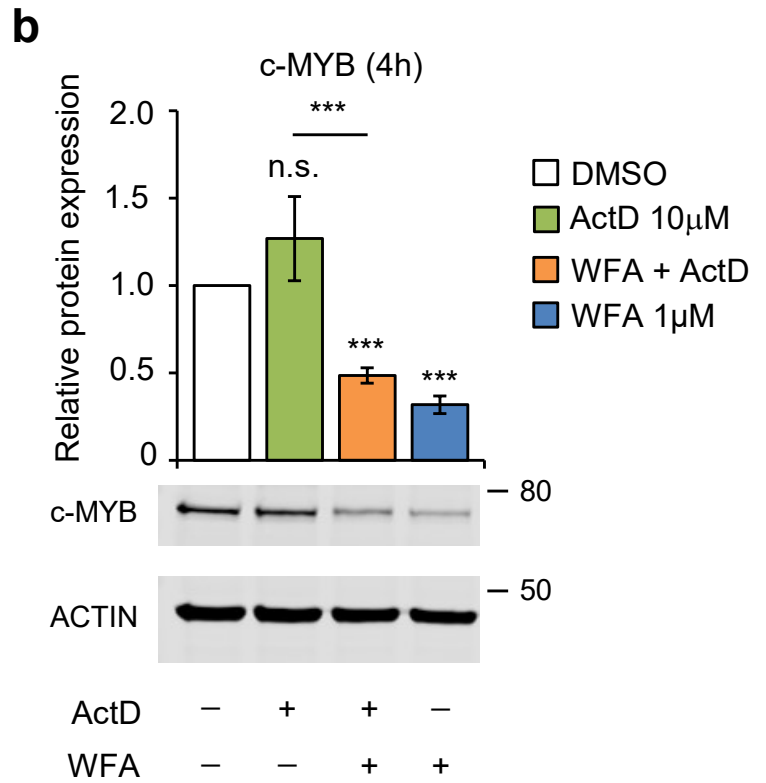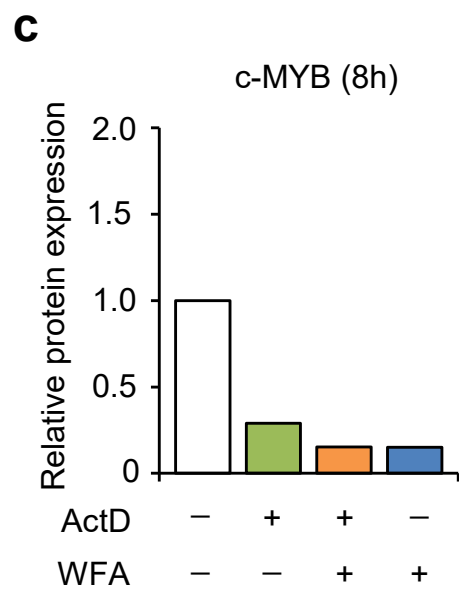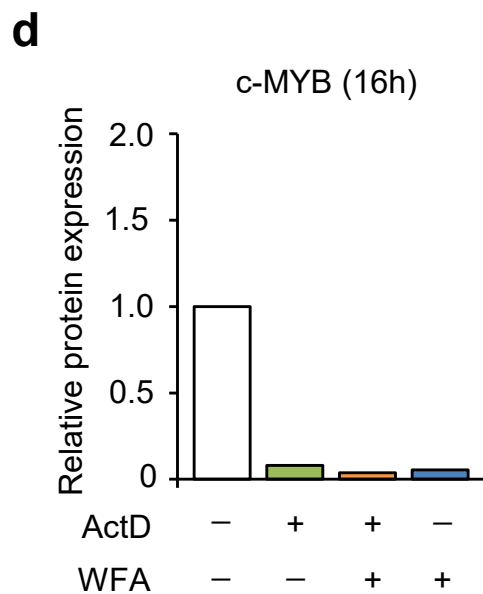

**Top five C5 GO BP (UP & DN) and C2 Reactome (UP) gene sets enriched in WFA RNA-seq data**

| <b>c5.go.bp.v7.4.symbols_DN</b>       |                                                       | <b>NES</b> | <b>FDR q</b> |
|---------------------------------------|-------------------------------------------------------|------------|--------------|
| 1                                     | GOBP_RIBOSOME_BIOGENESIS                              | -3.37      | 0            |
| 2                                     | GOBP_RRNA_METABOLIC_PROCESS                           | -3.3       | 0            |
| 3                                     | GOBP_NCRNA_PROCESSING                                 | -3.13      | 0            |
| 4                                     | GOBP_NCRNA_METABOLIC_PROCESS                          | -3.13      | 0            |
| 5                                     | GOBP_RIBOSOMAL_LARGE_SUBUNIT_BIOGENESIS               | -3.07      | 0            |
| <b>c5.go.bp.v7.4.symbols_UP</b>       |                                                       | <b>NES</b> | <b>FDR q</b> |
| 1                                     | GOBP_RESPONSE_TO_TOPOLOGICALLY_INCORRECT_PROTEIN      | 2.39       | 0            |
| 2                                     | GOBP_CHAPERONE_MEDIATED_PROTEIN_FOLDING               | 2.38       | 0            |
| 3                                     | GOBP_DE_NOVO_PROTEIN_FOLDING                          | 2.22       | 0            |
| 4                                     | GOBP_CHAPERONE_COFACTOR_DEPENDENT_PROTEIN_REFOLDING   | 2.2        | 0            |
| 5                                     | GOBP_PROTEIN_REFOLDING                                | 2.2        | 0            |
| <b>c2.cp.reactome.v7.4.symbols_UP</b> |                                                       | <b>NES</b> | <b>FDR q</b> |
| 1                                     | REACTOME_ATTENUATION_PHASE                            | 2.46       | 0            |
| 2                                     | REACTOME_HSF1_ACTIVATION                              | 2.45       | 0            |
| 3                                     | REACTOME_HSF1_DEPENDENT_TRANSACTIVATION               | 2.4        | 0            |
| 4                                     | REACTOME_HSP90_CHAPERONE_CYCLE_FOR_STEROID_HORMONE... | 2.38       | 0            |
| 5                                     | REACTOME_CELLULAR_RESPONSE_TO_HEAT_STRESS             | 2.1        | 0.001        |

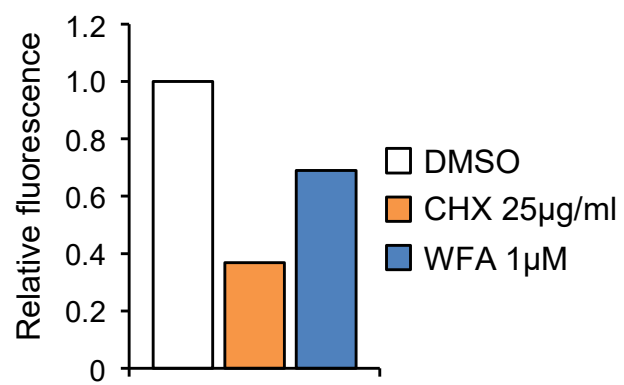



**a**

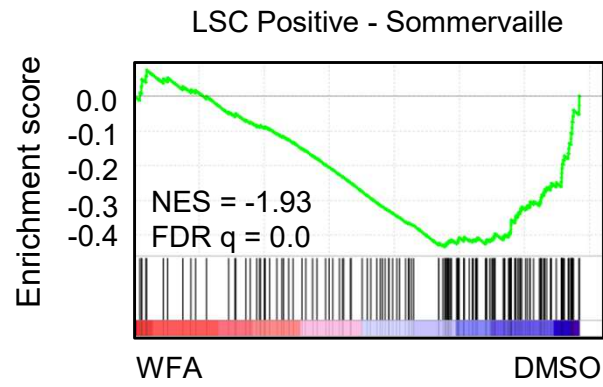

**b**

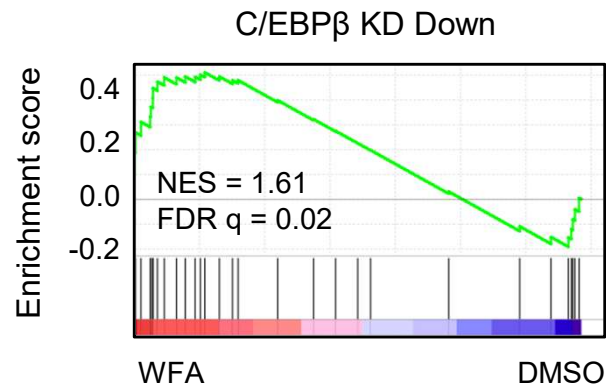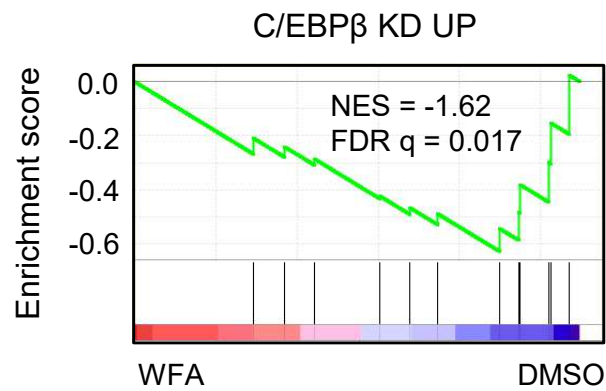

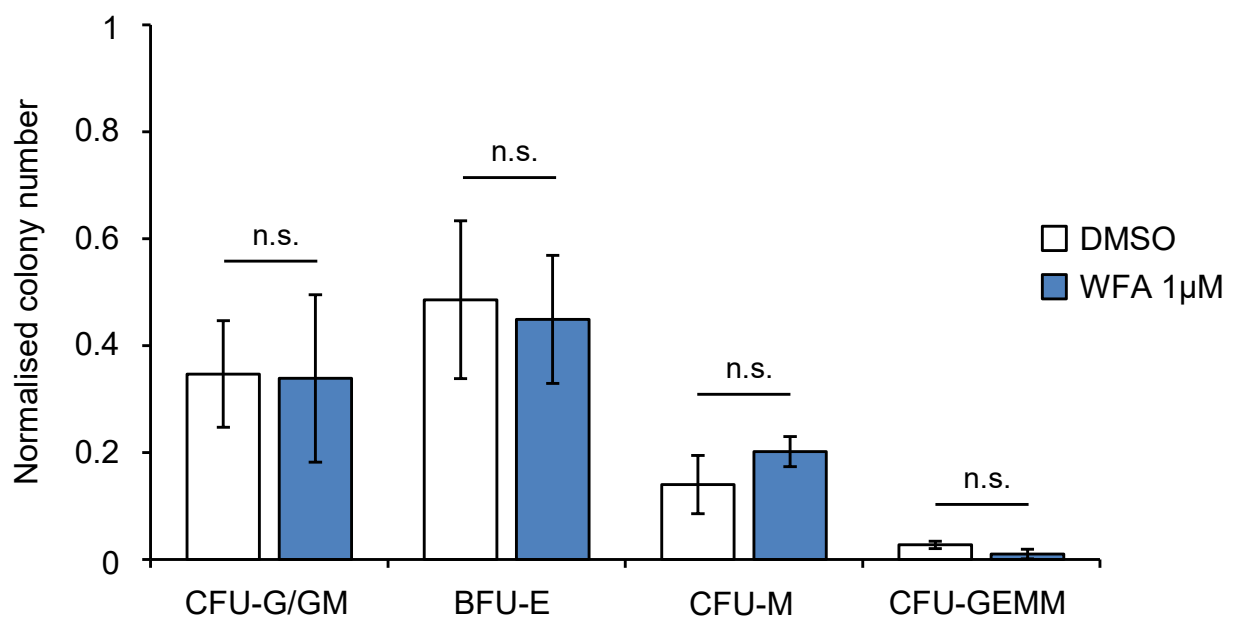

Supplement: 41375_2022_1554_MOESM1_ESM.pdf [file 41375_2022_1554_MOESM1_ESM.pdf]
