# Supplementary material for: Identification of a c-MYB-directed therapeutic for acute myeloid leukemia
Source: PubMed Central journal article supplement (PMC9162920; doi:10.1038/s41375-022-01554-9), 2022-04-02
Supplement: 41375_2022_1554_MOESM3_ESM.pdf [file 41375_2022_1554_MOESM3_ESM.pdf]

## Supplementary Figure Legends

**Supplementary Figure 1.** Relative expression of c-MYB target genes in THP1 cells exposed to DMSO or 1 $\mu$ M WFA for 6 hours. The RNA was collected from experiments independent to those used for the RNA-seq analysis. Bars and error bars are means and SD of three independent experiments. \*\*\* $P < 0.001$ , one sample  $t$  test.

**Supplementary Figure 2.** GSEA of **a** c-MYB repressed and activated gene sets, bound by c-MYB in mouse myeloid ERMYB cells [28] and deregulated in THP1 cells following siRNA mediated c-MYB silencing [29]; and **b** shRNA [15] and **c** CRISPR-mediated [30] c-MYB targeting in AML cells, in RNA-seq analysis of THP1 cells treated for 6 hours with DMSO or 1 $\mu$ M WFA.

**Supplementary Figure 3.** **a** SPI1, **b** LYL1 and **c** CBP protein expression in THP1 cells after 6 hours treatment with DMSO or 1 $\mu$ M WFA, normalized to **a**, **b** actin or **c** vinculin (VIN) loading controls and to DMSO treated controls. Bars and error bars are means and SD of three independent experiments. \* $P < 0.05$ ; n.s. not significant, one sample  $t$  test. Western blots below graphs show examples of protein expression.

**Supplementary Figure 4.** **a** Example of Annexin V/PI staining (left panel) and quantification of c-MYB protein expression (right panel) in THP1 cells treated with DMSO, 1 $\mu$ M WFA, 50 $\mu$ M ZVAD or WFA + ZVAD for 6 hours. Bars and error bars are means and SD of three independent experiments. \* $P < 0.05$ ; \*\* $P < 0.01$ ; \*\*\* $P < 0.001$ ; n.s. not significant, one sample  $t$  test, and unpaired Student's  $t$  test between single and combination treatments. Western blots below graphs show examples of c-MYB protein expression. **b**, **c** Examples of cell cycle flow cytometry plots of THP1 cells treated for **b** 6 hours or **c** 24 hours with DMSO or 1 $\mu$ M WFA. Numbers inside plots are percentages of cells in G0/G1 (bottom left), S (top) and G2/M (bottom right) phases of the cell cycle. **d**, **e** Quantification of data from **b** and **c**. Bars and error bars are

means and SD of three independent experiments.  $*P < 0.05$ ;  $***P < 0.001$ ; n.s. not significant, unpaired Student's *t* test between DMSO and WFA treated cells.

**Supplementary Figure 5.** c-MYB protein expression in AML cell lines treated for 6 hours with indicated combinations of DMSO, WFA (1 $\mu$ M) and MG132 (10 $\mu$ M), normalized to actin loading control and to DMSO treated controls. Bars and error bars are means and SD of three (U937) and four (SH11, MV4;11, OCI-AML3) independent experiments.  $*P < 0.05$ ;  $**P < 0.01$ ;  $***P < 0.001$ ; n.s. not significant, one sample *t* test. Western blots below graphs show examples of c-MYB protein expression.

**Supplementary Figure 6.** **a** *MYB* gene expression and **b** c-MYB protein expression in THP1 cells 4 hours after treatment with indicated combinations of DMSO, WFA (1 $\mu$ M) and Actinomycin D (10 $\mu$ M). Eukaryotic 18S rRNA was used to quantify qRT-PCR data and c-MYB protein was normalized to actin loading control and to DMSO treated controls. Bars and error bars are means and SD of four independent experiments.  $*P < 0.05$ ;  $**P < 0.01$ ;  $***P < 0.001$ ; n.s. not significant one sample *t* test, and unpaired Student's *t* test between single and combination treatments. Western blots below graph show examples of c-MYB protein expression. **c**, **d** c-MYB protein expression in THP1 cells **c** 8 hours and **d** 16 hours after treatment with indicated combinations of DMSO, WFA and Actinomycin D. Data represent a single experiment.

**Supplementary Figure 7.** The table shows the enrichment of the top five down- and upregulated gene sets from the c5.go.bp.v7.4.symbols.gmt and the top five upregulated gene sets from the c2.cp.reactome.v7.4.symbols.gmt collection of gene sets from the MSigDB database (<http://www.gsea-msigdb.org/gsea/msigdb/index.jsp>), in gene expression changes resulting from 6 hours exposure of THP1 cells to 1  $\mu$ M WFA or DMSO.

**Supplementary Figure 8.** OPP incorporation in THP1 cells treated with 25 $\mu$ g/ml CHX or 1 $\mu$ M WFA for 24 hours, normalized to DMSO treated control.

**Supplementary Figure 9.** GSEA of **a** gene sets positively correlating with leukaemia stem cell frequency and **b** shRNA targeting of *C/EBP $\beta$*  [29, 31], in RNA-seq analysis of THP1 cells treated for 6 hours with DMSO or 1 $\mu$ M WFA.

**Supplementary Figure 10.** Morphological assessment of colony formation by normal CD34<sup>+</sup> cord blood cells in the presence of DMSO or 1 $\mu$ M WFA. Colonies were scored as CFU-G/GM, BFU-E, CFU-M and CFU-GEMM. Bars and error bars are means and SD of three independent experiments. n.s. not significant, unpaired Student's *t* test between DMSO and WFA cultures.
