# Supplementary material for: Identification of a c-MYB-directed therapeutic for acute myeloid leukemia
Source: PubMed Central journal article supplement (PMC9162920; doi:10.1038/s41375-022-01554-9), 2022-04-02
Supplement: 41375_2022_1554_MOESM4_ESM.pdf [file 41375_2022_1554_MOESM4_ESM.pdf]

**Supplementary Table 1.** Patient sample characteristics.

| <b>PDX</b> | <b>Patient id</b> | <b>Sex</b> | <b>Age (yrs)</b> | <b>Cytogenetics</b>                                                                                                                                                                          |
|------------|-------------------|------------|------------------|----------------------------------------------------------------------------------------------------------------------------------------------------------------------------------------------|
| #1         | 210915c           | M          | 1.85             | Derived chromosome 17 resulting in gain of 1q, del(6p), add(18p) and loss of chromosomes 1, 7, 8, 9, 11 and 15 in one of the doubled-up clones by G-banded analysis. FISH:TP53 was preserved |
| #2         | 280717b           | F          | 2.38             | Abnormal clone with a t(11;19)(q23;p13) translocation detected by G-banded analysis. Evidence of KMT2A rearrangement by interphase FISH analysis                                             |
| #2(r)      | 270418a           | F          | 3.08             | Abnormal clone with a t(11;19)(q23;p13) translocation, as seen at diagnosis by G-banding. Somatic GATA2 mutation (new on relapse), FLT3-ITD negative.                                        |
| #4         | 160119a           |            | 0.44             | Monosomy 7 detected by interphase FISH and G-band analysis                                                                                                                                   |

MLL-AF9 #3: AML1547 patient sample characteristics previously reported in Walf-Vorderwulbecke et al (2018)
